# Supplementary material
Source: PubMed Central journal article supplement (PMC7042926)
Supplement: jamaotolaryngolheadnecksurg-146-331-s001.pdf [file jamaotolaryngolheadnecksurg-146-331-s001.pdf]

## Supplementary Online Content

Bruins TE, van Veen MM, Mooibroek-Leeuwerke T, Werker PMN, Broekstra DC, Dijkstra PU. Association of socioeconomic, personality, and mental factors with health-related quality of life in patients with facial palsy. *JAMA Otolaryngol Head Neck Surg*. Published online February 13, 2020. doi:10.1001/jamaoto.2019.4559

**eTable 1.** Detailed Patient Characteristics

**eTable 2.** Univariate Analysis FaCE Scale Total Score

**eTable 3.** Univariate Analysis FDI Physical Score

**eTable 4.** Univariate Analysis FDI Social Score

This supplementary material has been provided by the authors to give readers additional information about their work.

**eTable 1. Detailed Patient Characteristics**

| Variable (n valid observations)                | n (%)     | median (IQR)          |
|------------------------------------------------|-----------|-----------------------|
| <b>General</b>                                 |           |                       |
| Gender (121)                                   |           |                       |
| Male                                           | 58 (48.9) |                       |
| Female                                         | 63 (52.1) |                       |
| Age (years) (121)                              |           | 62 (48; 71)           |
| Marital status (120)                           |           |                       |
| No relationship±                               | 30 (24.8) |                       |
| Single                                         | 23        |                       |
| Divorced                                       | 4         |                       |
| Widow/widower                                  | 3         |                       |
| Relationship±                                  | 90 (74.4) |                       |
| In a relationship: not living together         | 2         |                       |
| In a relationship: living together             | 8         |                       |
| Married                                        | 80        |                       |
| Missing                                        | 1 (0.8)   |                       |
| Residence (inhabitants per municipality) (121) |           | 55939 (33634; 127492) |
| Durel subscale 1 (120)                         |           |                       |
| ORA never                                      | 87 (71.9) |                       |
| ORA ever                                       | 33 (27.3) |                       |
| Durel subscale 2 (121)                         |           |                       |
| NORA never                                     | 76 (62.8) |                       |
| NORA ever                                      | 45 (37.2) |                       |
| Durel subscale 3: IR (118)                     |           | 5.0 (3.0; 11.0)       |
| <b>Socio-economic status</b>                   |           |                       |
| Education (120)                                |           |                       |
| Lower±                                         | 79 (65.3) |                       |
| Primary school                                 | 5         |                       |
| Lower education                                | 21        |                       |
| Medium education                               | 53        |                       |
| Higher±                                        | 41 (33.9) |                       |
| Higher education                               | 41        |                       |
| Missing                                        | 1 (0.8)   |                       |
| Occupational status (119)                      |           |                       |
| Working±                                       | 67 (55.4) |                       |
| Not working±                                   | 52 (43.0) |                       |
| Missing                                        | 2 (1.7)   |                       |
| Income (net per month) (111)                   |           |                       |
| Low: Less than €1400,-±                        | 37 (30.6) |                       |
| Less than €800,-                               | 15        |                       |
| €800-€1400                                     | 22        |                       |
| Middle: €1400-€2400±                           | 41 (33.9) |                       |
| €1400-€1800                                    | 19        |                       |
| €1800-€2400                                    | 22        |                       |
| High: More than €2400±                         | 33 (27.3) |                       |
| €2400-€3200                                    | 17        |                       |
| More than €3200                                | 16        |                       |
| Missing                                        | 10 (8.3)  |                       |
| <b>Facial palsy related</b>                    |           |                       |
| Duration FP (years) (121)                      |           |                       |
| Laterality palsy (121)                         |           |                       |
| Left                                           | 57 (47.1) |                       |
| Right                                          | 59 (48.8) |                       |
| Bilateral                                      | 5 (4.1)   |                       |

**eTable 1. Detailed Patient Characteristics (continued)**

| Variable (n valid observations)               | n (%)     | median (IQR)   |
|-----------------------------------------------|-----------|----------------|
| Etiology (121)                                |           |                |
| Benign tumor±                                 | 44 (36.4) |                |
| Acoustic neuroma                              | 31 (25.6) |                |
| Parotid tumor                                 | 10 (8.3)  |                |
| Osteoma                                       | 2 (1.7)   |                |
| Glomus tumor                                  | 1 (0.8)   |                |
| Infection±                                    | 22 (18.2) |                |
| Bell's palsy                                  | 11 (9.1)  |                |
| Ramsay-Hunt                                   | 2 (1.7)   |                |
| Polio                                         | 3 (2.5)   |                |
| Otitis media                                  | 6 (5.0)   |                |
| Trauma±                                       | 18 (14.9) |                |
| Soft tissue trauma and temporal bone fracture | 10 (8.3)  |                |
| Iatrogenic                                    | 8 (6.6)   |                |
| Head and neck cancer±                         | 13 (10.7) |                |
| Brain tumor                                   | 8 (6.6)   |                |
| Head-neck cancer                              | 4 (3.3)   |                |
| Rhabdomyosarcoma                              | 1 (0.8)   |                |
| Congenital±                                   | 10 (8.3)  |                |
| Other±                                        | 14 (12.0) |                |
| Birth related                                 | 2 (1.7)   |                |
| HELLP syndrome                                | 1 (0.8)   |                |
| Cavernoma medulla oblongata                   | 1 (0.8)   |                |
| Guillain-Barre syndrome                       | 2 (1.7)   |                |
| M. Parry-Romberg                              | 1 (0.8)   |                |
| Unknown±                                      | 7 (5.8)   |                |
| Sunnybrook composite score (77)               |           | 30 (25; 42)    |
| <b>Personality</b>                            |           |                |
| TIPI (117)                                    |           |                |
| Extraversion                                  |           | 4.5 (3.0; 6.0) |
| Agreeableness                                 |           | 4.0 (3.5; 4.5) |
| Conscientiousness                             |           | 6.5 (5.5; 7.0) |
| Emotional Stability                           |           | 5.5 (4.0; 6.5) |
| Openness to experiences                       |           | 5.0 (4.5; 6.5) |
| <b>Mental</b>                                 |           |                |
| HADS anxiety (120)                            |           |                |
| No anxiety ( $\leq 7$ points)                 | 45 (37.2) |                |
| Moderate anxiety (8-10 points)                | 55 (45.5) |                |
| Severe anxiety ( $\geq 11$ points)            | 20 (16.5) |                |
| HADS depression (117)                         |           |                |
| No depression ( $\leq 7$ points)              | 11 (9.1)  |                |
| Moderate depression (8-10 points)             | 71 (58.7) |                |
| Severe depression ( $\geq 11$ points)         | 35 (28.9) |                |
| <b>HRQOL</b>                                  |           |                |
| FaCE total score (111)                        |           | 52 (5.0; 93.3) |
| FDI physical score (109)                      |           | 70 (63; 80)    |
| FDI social score (111)                        |           | 76.0 (64; 84)  |

IQR: interquartile range, FP: facial palsy, TIPI: Ten-Item Personality Inventory, DUREL: Duke University Religion Index, ORA: Organizational Religious Activity, NORA: Non-Organizational Religious Activity, IR: Intrinsic Religiosity, HADS: Hospital Anxiety and Depression Scale, Sunnybrook: Sunnybrook Facial Grading system, FaCE: Facial Clinimetric Evaluation, FDI: Facial Disability Index

± categories used in analysis

**eTable 2. Univariate Analysis FaCE Scale Total Score**

| Variable                                           | B       | 95% CI           | P       | R <sup>2</sup> |
|----------------------------------------------------|---------|------------------|---------|----------------|
| <b>General</b>                                     |         |                  |         |                |
| Gender (0 male; 1 female)                          | -5.56   | (-12.13; 1.02)   | 0.097*  | 0.025          |
| Age (years)                                        | -0.17   | (-0.36; 0.03)    | 0.088*  | 0.026          |
| Marital status (0 no relationship; 1 relationship) | -3.17   | (-10.86; 4.51)   | 0.415   | 0.006          |
| Residence population                               | <-0.001 | (<0.001; <0.001) | 0.851   | <-0.001        |
| <b>DUREL</b>                                       |         |                  |         |                |
| ORA (0 never; 1 ever)                              | -4.58   | (-12.03; 2.86)   | 0.225   | 0.013          |
| NORA (0 never; 1 ever)                             | -6.12   | (-12.95; 0.72)   | 0.079*  | 0.028          |
| IR                                                 | -0.40   | (-10.21; 0.41)   | 0.328   | 0.009          |
| <b>Socio-economic status</b>                       |         |                  |         |                |
| Education (0 lower; 1 higher)                      | 4.20    | (-2.77; 11.17)   | 0.235   | 0.013          |
| Occupational status (0 working; 1 not working)     | -8.22   | (-14.79; -1.65)  | 0.015*  | 0.054          |
| Income (net per month)                             |         |                  | 0.335   | 0.022          |
| Lower than €1400 (ref.)                            | -       | -                |         |                |
| €1400-€2400                                        | 6.30    | (-2.18; 14.79)   |         |                |
| Higher than €2400                                  | 4.14    | (-4.78; 13.05)   |         |                |
| <b>Facial palsy related</b>                        |         |                  |         |                |
| Duration FP (years)                                | -0.12   | (-0.30; 0.06)    | 0.180*  | 0.016          |
| Laterality FP (0 unilateral; 1 bilateral)          | -17.76  | (-33.45; -2.06)  | 0.027*  | 0.044          |
| <b>Etiology</b>                                    |         |                  |         |                |
| Head and neck cancer (ref.)                        | -       | -                | 0.760   | 0.024          |
| Infection                                          | 4.89    | (-8.09; 17.07)   |         |                |
| Benign tumor                                       | 2.73    | (-8.61; 14.08)   |         |                |
| Trauma                                             | 8.65    | (-4.20; 21.51)   |         |                |
| Congenital                                         | 4.86    | (-10.46; 20.17)  |         |                |
| Other                                              | 7.69    | (-6.16; 21.54)   |         |                |
| Sunnybrook composite score                         | 0.37    | (0.22; 0.53)     | <0.001* | 0.241          |
| <b>Personality</b>                                 |         |                  |         |                |
| <b>TIPI</b>                                        |         |                  |         |                |
| Extraversion                                       | 2.56    | (0.65; 4.48)     | 0.009*  | 0.062          |
| Agreeableness                                      | 0.01    | (-3.93; 3.96)    | 0.995   | <0.001         |
| Conscientiousness                                  | 0.25    | (-3.21; 3.71)    | 0.886   | <0.001         |
| Emotional Stability                                | 2.85    | (0.82; 4.88)     | 0.006*  | 0.059          |
| Openness to experiences                            | 2.33    | (-0.14; 4.80)    | 0.065*  | 0.032          |
| <b>Mental</b>                                      |         |                  |         |                |
| <b>HADS</b>                                        |         |                  |         |                |
| Anxiety                                            | -2.53   | (-4.11; -0.96)   | 0.002*  | 0.086          |
| Depression                                         | 0.81    | (-0.91; 2.53)    | 0.354   | 0.008          |

FaCE: Facial Clinimetric Evaluation, DUREL: Duke University Religion Index, ORA: Organizational Religious Activity, NORA: Non-Organizational Religious Activity, IR: Intrinsic Religiosity, FP: facial palsy, Sunnybrook: Sunnybrook Facial Grading system, TIPI: Ten-Item Personality Inventory, HADS: Hospital Anxiety and Depression Scale, \*<0.2

**eTable 3. Univariate Analysis FDI Physical Score**

| Variable                                           | B      | 95% CI           | P      | R <sup>2</sup> |
|----------------------------------------------------|--------|------------------|--------|----------------|
| <b>General</b>                                     |        |                  |        |                |
| Gender (0 male; 1 female)                          | -0.95  | (-7.12; 5.22)    | 0.761  | 0.029          |
| Age (years)                                        | -0.18  | (-0.36; -0.01)   | 0.038* | 0.040          |
| Marital status (0 no relationship; 1 relationship) | -6.93  | (-13.85; -0.004) | 0.050* | 0.035          |
| Residence population                               | <0.001 | (<0.001; <0.001) | 0.293  | 0.010          |
| <b>DUREL</b>                                       |        |                  |        |                |
| ORA (0 never; 1 ever)                              | -5.07  | (-11.86; 1.72)   | 0.142* | 0.020          |
| NORA (0 never; 1 ever)                             | -2.17  | (-8.54; 4.21)    | 0.502  | 0.004          |
| IR                                                 | -0.44  | (-1.20; 0.31)    | 0.245  | 0.013          |
| <b>Socio-economic status</b>                       |        |                  |        |                |
| Education (0 lower; 1 higher)                      | 5.03   | (-1.44; 11.48)   | 0.126* | 0.022          |
| Occupational status (0 working; 1 not working)     | -6.07  | (-12.27; 0.13)   | 0.055* | 0.035          |
| <b>Income (net per month)</b>                      |        |                  |        |                |
| Lower than €1400 (ref.)                            | -      | -                | 0.830  | 0.004          |
| €1400-€2400                                        | -1.95  | (-9.62; 5.72)    |        |                |
| Higher than €2400                                  | -2.24  | (-10.32; 5.85)   |        |                |
| <b>Facial palsy related</b>                        |        |                  |        |                |
| Duration FP (years)                                | 0.03   | (-0.13; 0.19)    | 0.681  | 0.002          |
| Laterality FP (0 unilateral; 1 bilateral)          | -6.81  | (-21.47; 7.86)   | 0.359  | 0.008          |
| <b>Etiology</b>                                    |        |                  |        |                |
| Head and neck cancer (ref.)                        | -      | -                | 0.176* | 0.064          |
| Infection                                          | 7.21   | (-4.66; 19.07)   |        |                |
| Benign tumor                                       | 0.46   | (-10.36; 11.28)  |        |                |
| Trauma                                             | 9.90   | (-2.20; 21.99)   |        |                |
| Congenital                                         | 10.45  | (-3.35; 24.26)   |        |                |
| Other                                              | 7.96   | (-5.24; 21.15)   |        |                |
| Sunnybrook composite score                         | 0.20   | (0.04; 0.36)     | 0.015* | 0.084          |
| <b>Personality</b>                                 |        |                  |        |                |
| <b>TIPI</b>                                        |        |                  |        |                |
| Extraversion                                       | 0.23   | (-1.58; 2.04)    | 0.802  | 0.001          |
| Agreeableness                                      | 0.80   | (-2.77; 4.37)    | 0.657  | 0.002          |
| Conscientiousness                                  | 0.66   | (-2.52; 3.83)    | 0.682  | 0.002          |
| Emotional Stability                                | 1.44   | (-0.52; 3.39)    | 0.148* | 0.020          |
| Openness to experiences                            | 0.77   | (-1.56; 3.10)    | 0.512  | 0.004          |
| <b>Mental</b>                                      |        |                  |        |                |
| <b>HADS</b>                                        |        |                  |        |                |
| Anxiety                                            | -1.29  | (-2.6; 0.05)     | 0.059  | 0.033          |
| Depression                                         | 0.84   | (-0.79; 2.47)    | 0.309  | 0.010          |

FDI: Facial Disability Index, DUREL: Duke University Religion Index, ORA: Organizational Religious Activity, NORA: Non-Organizational Religious Activity, IR: Intrinsic Religiosity, FP: facial palsy, Sunnybrook: Sunnybrook Facial Grading system, TIPI: Ten-Item Personality Inventory, HADS: Hospital Anxiety and Depression Scale, \*<0.2

**eTable 4. Univariate Analysis FDI Social Score**

| Variable                                           | B       | 95% CI          | P       | R <sup>2</sup> |
|----------------------------------------------------|---------|-----------------|---------|----------------|
| <b>General</b>                                     |         |                 |         |                |
| Gender (0 male; 1 female)                          | -2.68   | (-8.62; 3.27)   | 0.374   | 0.007          |
| Age (years)                                        | 0.06    | (-0.11; 0.24)   | 0.460   | 0.005          |
| Marital status (0 no relationship; 1 relationship) | 5.50    | (-1.26; 12.27)  | 0.110*  | 0.023          |
| Residence population                               | <-0.001 | (<0.001;<0.001) | 0.530   | 0.004          |
| <b>DUREL</b>                                       |         |                 |         |                |
| ORA (0 never; 1 ever)                              | -0.50   | (-7.16; 6.17)   | 0.883   | <0.001         |
| NORA (0 never; 1 ever)                             | -0.39   | (-6.54; 5.77)   | 0.901   | <0.001         |
| IR                                                 | -0.15   | (-0.88; 0.59)   | 0.690   | 0.002          |
| <b>Socio-economic status</b>                       |         |                 |         |                |
| Education (0 lower; 1 higher)                      | 1.94    | (-4.39; 8.28)   | 0.544   | 0.003          |
| Occupational status (0 working; 1 not working)     | 1.96    | (-3.99; 7.90)   | 0.516   | 0.004          |
| Income (net per month)                             |         |                 | 0.497   | 0.014          |
| Lower than €1400 (ref.)                            | -       | -               |         |                |
| €1400-€2400                                        | 4.15    | (-3.19; 11.49)  |         |                |
| Higher than €2400                                  | 3.42    | (-4.33; 11.17)  |         |                |
| <b>Facial palsy related</b>                        |         |                 |         |                |
| Duration FP (years)                                | -0.003  | (-0.16; 0.15)   | 0.971   | <0.001         |
| Laterality FP (0 unilateral; 1 bilateral)          | -19.30  | (-33.15; -5.45) | 0.007*  | 0.065          |
| <b>Etiology</b>                                    |         |                 |         |                |
| Head and neck cancer (ref.)                        | -       | -               | 0.098*  | 0.084          |
| Infection                                          | -4.80   | (-15.96; 6.36)  |         |                |
| Benign tumor                                       | -3.67   | (-13.75; 6.42)  |         |                |
| Trauma                                             | 2.11    | (-9.28; 13.50)  |         |                |
| Congenital                                         | -13.00  | (-26.08; 0.08)  |         |                |
| Other                                              | -11.00  | (-23.47; 1.47)  |         |                |
| Sunnybrook composite score                         | 0.06    | (-0.09; 0.22)   | 0.401   | 0.010          |
| <b>Personality</b>                                 |         |                 |         |                |
| <b>TIPi</b>                                        |         |                 |         |                |
| Extraversion                                       | 2.90    | (1.32; 4.49)    | <0.001* | 0.112          |
| Agreeableness                                      | 1.07    | (-2.22; 4.35)   | 0.522   | 0.004          |
| Conscientiousness                                  | 3.24    | (0.36; 6.12)    | 0.028*  | 0.045          |
| Emotional Stability                                | 4.00    | (2.37; 5.63)    | <0.001* | 0.184          |
| Openness to experiences                            | 2.90    | (0.814; 4.99)   | 0.007*  | 0.068          |
| <b>Mental</b>                                      |         |                 |         |                |
| <b>HADS</b>                                        |         |                 |         |                |
| Anxiety                                            | -2.80   | (-4.00; -1.60)  | 0.001*  | 0.165          |
| Depression                                         | -1.56   | (-3.10; -0.01)  | 0.048   | 0.037          |

FDI: Facial Disability Index, DUREL: Duke University Religion Index, ORA: Organizational Religious Activity, NORA: Non-Organizational Religious Activity, IR: Intrinsic Religiosity, FP: facial palsy, Sunnybrook: Sunnybrook Facial Grading system, TIPi: Ten-Item Personality Inventory, HADS: Hospital Anxiety and Depression Scale, \*<0.2
